# Supplementary material
Source: Springer Nature journal article supplement (https://www.springermedizin.de/resource/supplementary/12935_2014_541_MOESM3_ESM.pdf/9540812)

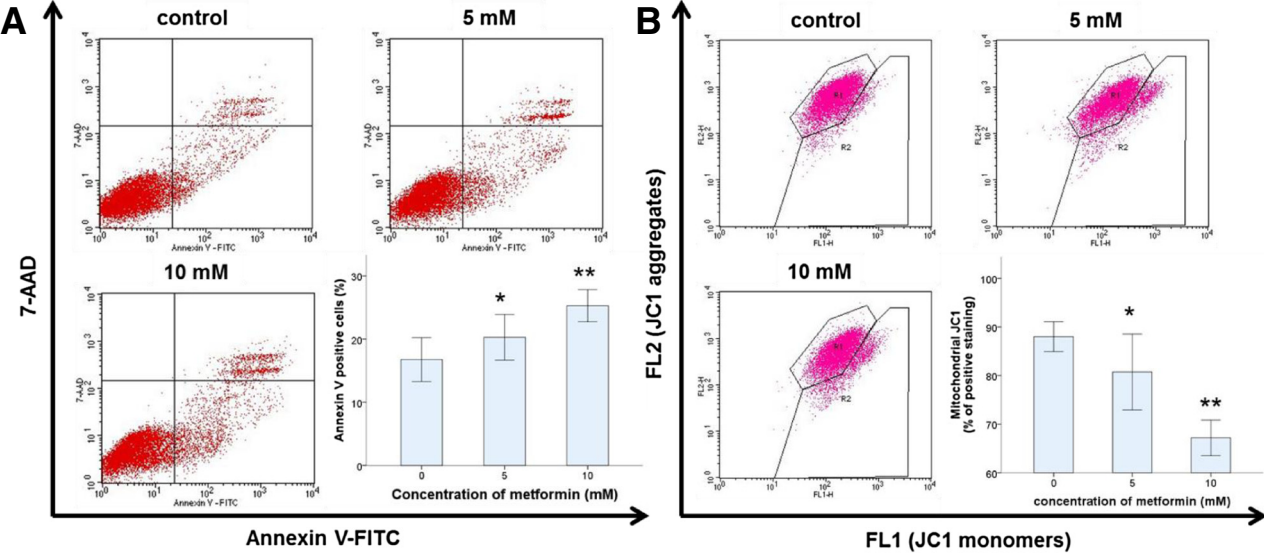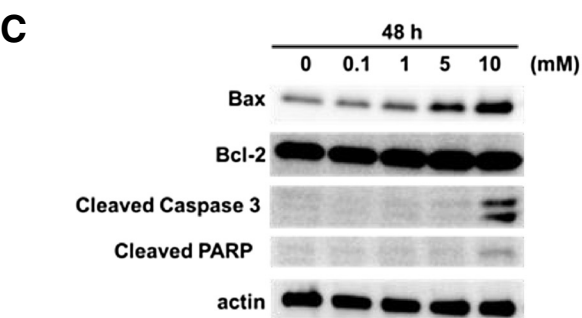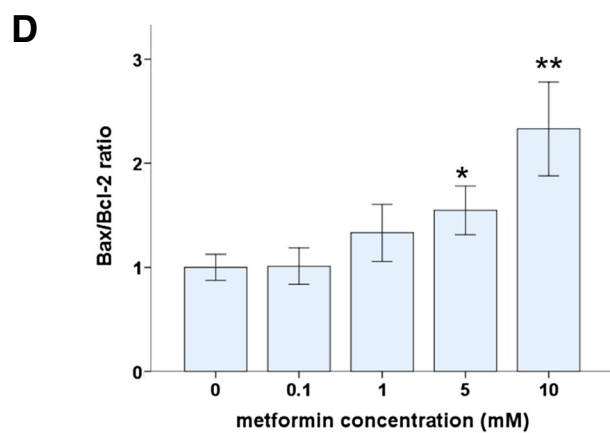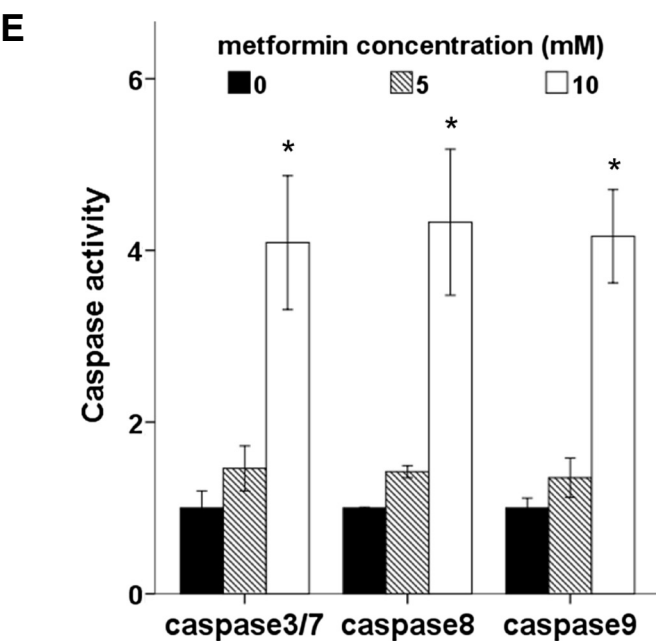

Supplement: MOESM3 [file 9540812]
